# Supplementary material for: Intake of citrus fruits and vegetables and the intensity of defecation urgency syndrome among gynecological cancer survivors
Source: PubMed Central journal article supplement (PMC6314594; doi:10.1371/journal.pone.0208115), 2019-01-02
Supplement: pone.0208115.s001.pdf [file pone.0208115.s001.pdf]

# S1 File

## Survey questions

### Swedish

1. Har Du haft lös avföring, det senaste halvåret?
  - Nej
  - Ja, vid enstaka tillfällen
  - Ja, åtminstone någon gång varje månad
  - Ja, åtminstone någon gång varje vecka
  - Ja, åtminstone tre gånger varje vecka
  - Ja, åtminstone någon gång varje dag
2. Har Du haft hård avföring som har varit svår att få ut, det senaste halvåret?
  - Nej
  - Ja, vid enstaka tillfällen
  - Ja, åtminstone någon gång varje månad
  - Ja, åtminstone någon gång varje vecka
  - Ja, åtminstone tre gånger varje vecka
  - Ja, åtminstone någon gång varje dag
3. Hur har Din förmåga varit att vid behov kunna krysta ut avföringen, det senaste halvåret?
  - Inte aktuellt**, jag har inte haft behov av att krysta ut avföringen, det senaste halvåret
  - Ingen förmåga
  - Liten förmåga
  - Måttlig förmåga
  - Stor förmåga
4. Har Du haft en känsla av att inte ha tömt tarmen fullständigt, det senaste halvåret?
  - Nej
  - Ja, vid enstaka tillfällen
  - Ja, åtminstone någon gång varje månad
  - Ja, åtminstone någon gång varje vecka
  - Ja, åtminstone tre gånger varje vecka
  - Ja, åtminstone någon gång varje dag
5. Har Du återvänt till toaletten inom en timme efter avföring för att återigen tömma tarmen, det senaste halvåret?
  - Nej
  - Ja, vid enstaka tillfällen
  - Ja, åtminstone någon gång varje månad

- Ja, åtminstone någon gång varje vecka
- Ja, åtminstone tre gånger varje vecka
- Ja, åtminstone någon gång varje dag

6. Har Du haft känsla av uppblåsthet i magen, det senaste halvåret?

- Nej
- Ja, vid enstaka tillfällen
- Ja, åtminstone någon gång varje månad
- Ja, åtminstone någon gång varje vecka
- Ja, åtminstone tre gånger varje vecka
- Ja, åtminstone någon gång varje dag

7. Har det kommit blod från tarmen, det senaste halvåret?

- Nej
- Ja, vid enstaka tillfällen
- Ja, åtminstone någon gång varje månad
- Ja, åtminstone någon gång varje vecka
- Ja, åtminstone tre gånger varje vecka
- Ja, åtminstone någon gång varje dag

8. Har det kommit slem från tarmen, det senaste halvåret?

- Nej
- Ja, vid enstaka tillfällen
- Ja, åtminstone någon gång varje månad
- Ja, åtminstone någon gång varje vecka
- Ja, åtminstone tre gånger varje vecka
- Ja, åtminstone någon gång varje dag

9. Har Du haft klåda vid ändtarmsöppningen, det senaste halvåret?

- Nej
- Ja, vid enstaka tillfällen
- Ja, åtminstone någon gång varje månad
- Ja, åtminstone någon gång varje vecka
- Ja, åtminstone tre gånger varje vecka
- Ja, åtminstone någon gång varje dag

10. Har Du haft smärta i ändtarmsöppningen, det senaste halvåret?

- Nej
- Ja, vid enstaka tillfällen
- Ja, åtminstone någon gång varje månad
- Ja, åtminstone någon gång varje vecka

- Ja, åtminstone tre gånger varje vecka
- Ja, åtminstone någon gång varje dag

11. Har Du haft plötsligt påkomna avföringsträngningar som krävt omedelbart toalettbesök, det senaste halvåret?

- Nej
- Ja, vid enstaka tillfällen
- Ja, åtminstone någon gång varje månad
- Ja, åtminstone någon gång varje vecka
- Ja, åtminstone tre gånger varje vecka
- Ja, åtminstone någon gång varje dag

12. Hur länge har Du kunnat hålla avföringen vid trängningar, det senaste halvåret?

- Inte aktuellt***, jag har inte haft avföringsträngningar, det senaste halvåret
- Kortare tid än 1 minut
- Mellan 1 och 5 minuter
- Mellan 5 och 10 minuter
- Mellan 10 och 30 minuter
- 30 minuter eller längre

13. Har Du haft omedelbart behov av en toalett om Du behövt tömma tarmen, det senaste halvåret?

- Nej
- Ja, vid enstaka tillfällen
- Ja, åtminstone någon gång varje månad
- Ja, åtminstone någon gång varje vecka
- Ja, åtminstone tre gånger varje vecka
- Ja, åtminstone någon gång varje dag

14. Har Du utan förvarning läckt avföring i kläderna, trots att Du tidigare tömt tarmen, det senaste halvåret?

- Nej
- Ja, vid enstaka tillfällen
- Ja, åtminstone någon gång varje månad
- Ja, åtminstone någon gång varje vecka
- Ja, åtminstone tre gånger varje vecka
- Ja, åtminstone någon gång varje dag

15. Har Du utan förvarning tömt all avföring i kläderna, det senaste halvåret?

- Nej
- Ja, vid enstaka tillfällen
- Ja, åtminstone någon gång varje månad
- Ja, åtminstone någon gång varje vecka
- Ja, åtminstone tre gånger varje vecka

Ja, åtminstone någon gång varje dag

16. Har det hänt att Du inte har kunnat hålla kvar gas (fjärtar, fisar) i ändtarmen när det behövts, det senaste halvåret?

Nej

Ja, vid enstaka tillfällen

Ja, åtminstone någon gång varje månad

Ja, åtminstone någon gång varje vecka

Ja, åtminstone tre gånger varje vecka

Ja, åtminstone någon gång varje dag

17. Har Du haft ljudliga gasavgångar (fjärtar, fisar) som Du inte kunnat stoppa, det senaste halvåret?

Nej

Ja, vid enstaka tillfällen

Ja, åtminstone någon gång varje månad

Ja, åtminstone någon gång varje vecka

Ja, åtminstone tre gånger varje vecka

Ja, åtminstone någon gång varje dag

18. Har Du haft illaluktande gasavgångar (fjärtar, fisar) som Du inte kunnat stoppa, det senaste halvåret?

Nej

Ja, vid enstaka tillfällen

Ja, åtminstone någon gång varje månad

Ja, åtminstone någon gång varje vecka

Ja, åtminstone tre gånger varje vecka

Ja, åtminstone någon gång varje dag

19. Har Du haft läckage av slem från ändtarmen när Du varit vaken, det senaste halvåret?

Nej

Ja, vid enstaka tillfällen

Ja, åtminstone någon gång varje månad

Ja, åtminstone någon gång varje vecka

Ja, åtminstone tre gånger varje vecka

Ja, åtminstone någon gång varje dag

20. Har Du haft läckage av blod från ändtarmen när Du varit vaken, det senaste halvåret?

Nej

Ja, vid enstaka tillfällen

Ja, åtminstone någon gång varje månad

Ja, åtminstone någon gång varje vecka

- Ja, åtminstone tre gånger varje vecka
- Ja, åtminstone någon gång varje dag

21. Har Du haft läckage av lös avföring när Du varit vaken, det senaste halvåret?

- Nej
- Ja, vid enstaka tillfällen
- Ja, åtminstone någon gång varje månad
- Ja, åtminstone någon gång varje vecka
- Ja, åtminstone tre gånger varje vecka
- Ja, åtminstone någon gång varje dag

22. Har Du haft läckage av fast avföring när Du varit vaken, det senaste halvåret?

- Nej
- Ja, vid enstaka tillfällen
- Ja, åtminstone någon gång varje månad
- Ja, åtminstone någon gång varje vecka
- Ja, åtminstone tre gånger varje vecka
- Ja, åtminstone någon gång varje dag

23. Har Du haft läckage av slem från ändtarmen, när Du sovit, det senaste halvåret?

- Nej
- Ja, vid enstaka tillfällen
- Ja, åtminstone någon gång varje månad
- Ja, åtminstone någon gång varje vecka
- Ja, åtminstone tre gånger varje vecka
- Ja, åtminstone någon gång varje dag

24. Har Du haft läckage av blod från ändtarmen, när Du sovit, det senaste halvåret?

- Nej
- Ja, vid enstaka tillfällen
- Ja, åtminstone någon gång varje månad
- Ja, åtminstone någon gång varje vecka
- Ja, åtminstone tre gånger varje vecka
- Ja, åtminstone någon gång varje dag

25. Har Du haft läckage av lös avföring, när Du sovit, det senaste halvåret?

- Nej
- Ja, vid enstaka tillfällen
- Ja, åtminstone någon gång varje månad
- Ja, åtminstone någon gång varje vecka

- Ja, åtminstone tre gånger varje vecka
- Ja, åtminstone någon gång varje dag

26. Har Du haft läckage av fast avföring när Du sovit, det senaste halvåret?

- Nej
- Ja, vid enstaka tillfällen
- Ja, åtminstone någon gång varje månad
- Ja, åtminstone någon gång varje vecka
- Ja, åtminstone tre gånger varje vecka
- Ja, åtminstone någon gång varje dag

27. Har Du tyckt att Du har luktat avföring någon gång, det senaste halvåret?

- Nej
- Ja, vid enstaka tillfällen
- Ja, åtminstone någon gång varje månad
- Ja, åtminstone någon gång varje vecka
- Ja, åtminstone tre gånger varje vecka
- Ja, åtminstone någon gång varje dag

28. Har Du haft smärtor i buken, det senaste halvåret?

- Nej
- Ja, vid enstaka tillfällen
- Ja, åtminstone någon gång varje månad
- Ja, åtminstone någon gång varje vecka
- Ja, åtminstone tre gånger varje vecka
- Ja, åtminstone någon gång varje dag

## English

1. Have you had a loose bowel movement during the past half year?

- No
- Yes, on occasion
- Yes, at least once a month
- Yes, at least once a week
- Yes, at least three times a week
- Yes, at least once a day

2. Have you had a hard bowel movement that has been hard to get out during the past half year?

- No
- Yes, on occasion
- Yes, at least once a month
- Yes, at least once a week

- Yes, at least three times a week
  - Yes, at least once a day
3. Have you been able to push out stools when you needed to during the past half year?
- Not a problem***, I have not needed to push hard to have a bowel movement during the past half year
  - Not able
  - Slightly able
  - Moderately able
  - Completely able
4. Do you have the feeling that you have not been able to completely empty your bowels during the past half year?
- No
  - Yes, on occasion
  - Yes, at least once a month
  - Yes, at least once a week
  - Yes, at least three times a week
  - Yes, at least once a day
5. Have you had to go to the toilet within an hour after a bowel movement to once again empty your bowels during the past half year?
- No
  - Yes, on occasion
  - Yes, at least once a month
  - Yes, at least once a week
  - Yes, at least three times a week
  - Yes, at least once a day
6. Have you had the feeling that your stomach is bloated during the past half year?
- No
  - Yes, on occasion
  - Yes, at least once a month
  - Yes, at least once a week
  - Yes, at least three times a week
  - Yes, at least once a day
7. Has blood come out from your bowels during the past half year?

- No
- Yes, on occasion
- Yes, at least once a month
- Yes, at least once a week
- Yes, at least three times a week
- Yes, at least once a day

8. Has mucus come out from your bowels during the past half year?

- No
- Yes, on occasion
- Yes, at least once a month
- Yes, at least once a week
- Yes, at least three times a week
- Yes, at least once a day

9. Have you had itching in your anus during the past half year?

- No
- Yes, on occasion
- Yes, at least once a month
- Yes, at least once a week
- Yes, at least three times a week
- Yes, at least once a day

10. Have you had pain in your anus during the past half year?

- No
- Yes, on occasion
- Yes, at least once a month
- Yes, at least once a week
- Yes, at least three times a week
- Yes, at least once a day

11. Have you had a sudden need to defecate that has required an immediate visit to the toilet during the past half year?

- No
- Yes, on occasion
- Yes, at least once a month
- Yes, at least once a week
- Yes, at least three times a week
- Yes, at least once a day

12. How long have you been able to keep from defecating when you have had an urgent need to defecate during the past half year?



***Not at present***, I have not had the need to defecate during the past half year.

- Less than 1 minute
- Between 1 and 5 minutes
- Between 5 and 10 minutes
- Between 10 and 30 minutes
- 30 minutes or longer

13. Have you had an immediate need for a toilet if you needed to defecate during the past half year?

- No
- Yes, on occasion
- Yes, at least once a month
- Yes, at least once a week
- Yes, at least three times a week
- Yes, at least once a day

14. Have you without forewarning leaked feces into your clothing even though you had earlier emptied your bowels during the past half year?

- No
- Yes, on occasion
- Yes, at least once a month
- Yes, at least once a week
- Yes, at least three times a week
- Yes, at least once a day
- 

15. Have you without forewarning completely emptied your bowels into your clothing during the past half year?

- No
- Yes, on occasion
- Yes, at least once a month
- Yes, at least once a week
- Yes, at least three times a week
- Yes, at least once a day

16. Has it happened that you have not been able to keep from releasing gas (farting) from your bowels when needed during the past half year?

- No
- Yes, on occasion
- Yes, at least once a month
- Yes, at least once a week
- Yes, at least three times a week

Yes, at least once a day

17. Have you had audible release of gas (farts) that you could not prevent during the past half year?

- No
- Yes, on occasion
- Yes, at least once a month
- Yes, at least once a week
- Yes, at least three times a week
- Yes, at least once a day

18. Have you had smelly release of gas (farts) that you could not stop during the past half year?

- No
- Yes, on occasion
- Yes, at least once a month
- Yes, at least once a week
- Yes, at least three times a week
- Yes, at least once a day

19. Have you had leakage of mucus from your rectum when you have been awake during the past half year?

- No
- Yes, on occasion
- Yes, at least once a month
- Yes, at least once a week
- Yes, at least three times a week
- Yes, at least once a day

20. Have you had leakage of blood from your rectum when you were awake during the past half year?

- No
- Yes, on occasion
- Yes, at least once a month
- Yes, at least once a week
- Yes, at least three times a week
- Yes, at least once a day

21. Have you had leakage of loose stools when you have been awake during the past half year??

- No
- Yes, on occasion

- Yes, at least once a month
- Yes, at least once a week
- Yes, at least three times a week
- Yes, at least once a day

22. Have you had leakage of solid stools when you have been awake during the past half year?

- No
- Yes, on occasion
- Yes, at least once a month
- Yes, at least once a week
- Yes, at least three times a week
- Yes, at least once a day

23. Have you had leakage of mucus from your rectum when you were sleeping during the past half year?

- No
- Yes, on occasion
- Yes, at least once a month
- Yes, at least once a week
- Yes, at least three times a week
- Yes, at least once a day

24. Have you had leakage of blood from your rectum when you were sleeping during the past half year?

- No
- Yes, on occasion
- Yes, at least once a month
- Yes, at least once a week
- Yes, at least three times a week
- Yes, at least once a day

25. Have you had leakage of loose stools when you were sleeping during the past half year?

- No
- Yes, on occasion
- Yes, at least once a month
- Yes, at least once a week
- Yes, at least three times a week
- Yes, at least once a day

26. Have you had leakage of solid stools when you were sleeping during the past half year?

- No
- Yes, on occasion
- Yes, at least once a month
- Yes, at least once a week
- Yes, at least three times a week
- Yes, at least once a day

27. Have you felt that you have smelled your stools at some time during the past half year?

- No
- Yes, on occasion
- Yes, at least once a month
- Yes, at least once a week
- Yes, at least three times a week
- Yes, at least once a day

28. Have you had pain in your abdomen during the past half year?

- No
- Yes, on occasion
- Yes, at least once a month
- Yes, at least once a week
- Yes, at least three times a week
- Yes, at least once a day
